# Supplementary material for: Widespread impacts and insights contrasted between extreme North American heatwaves in 1941 and 2021
Source: Research Square preprint supplement (doi:10.21203/rs.3.rs-8379513/v1), 2025-12-31
Supplement: Supplementary file 1 [file 31e6bae3d4ec05f79aa04bcf.pdf]

Supporting Information for

**Widespread impacts and insights contrasted between extreme  
North American heatwaves in 1941 and 2021**

Sam Anderson<sup>1</sup> and Shawn Chartrand<sup>1</sup>

<sup>1</sup>School of Environmental Science, Simon Fraser University, Burnaby, British Columbia

**Contents of this file**

Tables S1 and S2  
Figures S1 and S2

**Introduction**

This supporting information provides figures to further contextualize and add details to the methods and results presented in the main paper.

**Table S1.** A summary of newspaper article themes and categories, along with category descriptions and example headlines.

| Theme           | Category             | Description                                                                                | Example Headline                                                                                                                                           |
|-----------------|----------------------|--------------------------------------------------------------------------------------------|------------------------------------------------------------------------------------------------------------------------------------------------------------|
| Weather         | Weather forecast     | Predictions of future weather, or comparisons to prior predictions                         | “Break in heat wave tomorrow” (Seattle Daily Times; July 16, 1941)                                                                                         |
|                 | Weather data         | Quantitative meteorological observations (i.e. daily tables)                               | “State Swelters; Mercury at 100” (The Bend Bulletin; July 15, 1941)                                                                                        |
|                 | Weather description  | Description of heatwave or other meteorological phenomena                                  | “Mercury Rising in London Area” (The Windsor Daily Star; July 23, 1941)                                                                                    |
|                 | Weather record       | Record-breaking meteorological observation, or observations put in context of past records | “Mercury Hits Record Level” (Kamloops Sentinel; July 17, 1941)                                                                                             |
|                 | Pre-heatwave weather | Description of seasonal conditions or weather events that occurred prior to the heatwave   | “Crops Benefitting From Increased Rainfall Here” (Saskatoon Star-Phoenix; July 9, 1941)                                                                    |
| Natural systems | Forestry             | Related to forests or the lumber industry                                                  | “Closure of Forests in Operation / Period of Continued Drought Forces Action to Protect Timber / Effective Last Night” (Nanaimo Free Press; July 17, 1941) |
|                 | Wildfire             | Forest fires and grass fires in natural areas                                              | “Lightning Starts Hundreds of Fires / Rangers Battling Blazes on Coast” (The Vancouver Sun; July 18, 1941)                                                 |
|                 | Fire (non-wildfire)  | Fires in urban or built environments (i.e. house fires)                                    | “Fire Damages School” (Saskatoon Star-Phoenix; July 24, 1941)                                                                                              |
|                 | Hydrology            | Related to natural hydrological systems (i.e. rivers, lakes, glaciers)                     | “Melting Glacier Floods Pemberton” (The Vancouver Sun; July 21, 1941)                                                                                      |
|                 | Animals              | Experiences and behaviours of non-livestock animals (i.e. fish,                            | “Even Trout Seek Depth in Heat Wave” (The Vancouver Sun; July 18, 1941)                                                                                    |

|                        |                                |                                                                                                  |                                                                                                                                                                             |
|------------------------|--------------------------------|--------------------------------------------------------------------------------------------------|-----------------------------------------------------------------------------------------------------------------------------------------------------------------------------|
|                        |                                | pets)                                                                                            |                                                                                                                                                                             |
|                        | Tides                          | Related to or mentions of the tides during the heatwave                                          | “No Long Runouts / Tidewaters Kind to Bathers” (The Vancouver Daily Province; July 17, 1941)                                                                                |
| Food and water systems | Consumptive water use          | Related to human water use, including municipal water, irrigation, and dams                      | “City Water Fails After Hottest Day” (The Calgary Herald; July 19, 1941)                                                                                                    |
|                        | Crops                          | Related to cultivated plants                                                                     | “Heat Does Crop Damage Up To 70 Percent” (The Winnipeg Tribune; July 21, 1941)                                                                                              |
|                        | Livestock                      | Related to domesticated animals in agricultural settings, including production of dairy products | “Crisis Looms! Calling All Cows! Ice Cream Supply Low; Heat Slows Bovines, Refrigeration” (The Vancouver Sun; July 17, 1941)                                                |
| Human health           | Mortality, direct              | Death due to heat exposure                                                                       | “Heat kills man” (The Windsor Daily Star; July 25, 1941)                                                                                                                    |
|                        | Mortality, indirect            | Death due to heat-moderated behaviour (i.e. drowning)                                            | “Drowns in Willamette... [11-year-old] was drowned while trying to keep cool in the Willamette river near the Wheatland ferry yesterday” (The Bend Bulletin; July 16, 1941) |
|                        | Drowning, other                | Death due to drowning, but not directly attributed to the heatwave                               | “Bank Manager is Drowned Trying to Rescue Young Son” (The Globe and Mail; July 26, 1941)                                                                                    |
|                        | Mortality, other               | Non-drowning death during heatwave, but not directly attributed to heatwave                      | “Umpire Dies in Exhibition Game” (The Bend Bulletin; July 21, 1941)                                                                                                         |
|                        | Morbidity and injury, direct   | Morbidity or injury due to heat exposure (i.e. heat prostration)                                 | “All of East an Inferno / Collapses Numerous All Over Canada and U. S.” (The Windsor Daily Star; July 28, 1941)                                                             |
|                        | Morbidity and injury, indirect | Morbidity or injury due to heat-moderated behaviour                                              | “Girl Injured Helping Fight Forest Fire” (Nanaimo Free Press; July 14, 1941)                                                                                                |

|                                    |                              |                                                                                                                                                       |                                                                                                                                                                                   |
|------------------------------------|------------------------------|-------------------------------------------------------------------------------------------------------------------------------------------------------|-----------------------------------------------------------------------------------------------------------------------------------------------------------------------------------|
|                                    | Morbidity and injury, other  | Other relevant examples of morbidity and injury (i.e. near-fatalities)                                                                                | “Quesnel Girl Nearly Drowns at Mud Lake” (The Cariboo Observer; July 19, 1941)                                                                                                    |
| Critical infrastructure            | Infrastructure               | Heatwave impacts on the built environment, including buildings, bridges, and roads                                                                    | “Traffic Disrupted / Heat Moves Concrete Slabs On Highway” (The Vancouver Daily Province; July 17, 1941)                                                                          |
|                                    | Transportation               | Related to the mobility of people                                                                                                                     | “Sunny Weather Attracts Many to Seba Beach / Week-end Visitors Throng Cottages at Lake Resort / Arrive by Motor” (Edmonton Journal; July 24, 1941)                                |
|                                    | Housing                      | Heatwave impacts on people in dwellings                                                                                                               | “Under Roof of Stars / Heat-Harassed, Hundreds Throng Parks ... The upper rooms of almost every home were simply unbearable” (The Vancouver Daily Province; July 18, 1941)        |
|                                    | Industry                     | Related to business or sales (i.e. icemakers, ice cream vendors)                                                                                      | “Ice Dealers Hit New Highs in Heat” (The Vancouver Daily Province; July 19, 1941)                                                                                                 |
|                                    | Trade                        | Related to the transportation of goods                                                                                                                | “Lemon Shortage Is Caused By Prolonged Heat Wave... ‘People want lemons and it takes about seven or eight days to complete a shipment.’” (The Seattle Daily Times; July 17, 1941) |
| Social infrastructure and services | Public service announcements | Communications to raise public awareness about policy or to influence behaviour                                                                       | “More than ever before, Britain needs British Columbia lumber! Prevent forest fires” (Prince George Citizen; July 24, 1941)                                                       |
|                                    | Sports and recreation        | Related to either heatwave impacts on athletics/recreation, or activities chosen because of the heatwave (i.e. popularity of beaches, swimming pools) | “It Sure Was Hot / City’s Beach Records Smashed / Warmest day of the Year Drives Populace Outdoors” (The Vancouver Daily Province; July 15, 1941)                                 |
|                                    | Crime                        | Reported relationships between                                                                                                                        | “Woodpile Robbed in This Weather / Perspiring                                                                                                                                     |

|           |                            |                                                                                                                                                   |                                                                                                                             |
|-----------|----------------------------|---------------------------------------------------------------------------------------------------------------------------------------------------|-----------------------------------------------------------------------------------------------------------------------------|
|           |                            | crime and the heatwave, including the judicial system                                                                                             | Thieves Steal Fan, Icebox” (The Vancouver Sun; July 17, 1941)                                                               |
|           | Recommendations and advice | Suggested actions for managing the heatwave (i.e. cooling, cooking, and health tips)                                                              | “Hats For Protection Against Hot Sun Urged” (The Regina Leader-Post; July 21, 1941)                                         |
|           | Behaviour                  | Related to how and why people either do or do not modify their actions based on the weather conditions (i.e. sleeping outside)                    | “Too Warm on Farms / Bulkley Valley Haymakers Lay Off in Mid-Day – 100 Above” (The Prince Rupert Daily News; July 18, 1941) |
| Narrative | Relative perspective       | Perspectives that centre on the heatwave in relation to somewhere else (i.e. tourists commenting on how the heat compares to where they are from) | “Vancouver Visitors Say Climate is Wonderful in Spite of Heat” (The Vancouver Daily Province; July 16, 1941)                |
|           | Framing                    | Heatwave used as a narrative tool to frame or discuss non-heatwave topics                                                                         | “A Cooling Thought – State Mint Industry Booming” (The Seattle Daily Times; July 18, 1941)                                  |
| Conflict  | Conflict                   | Relationships between the heatwave and World War II                                                                                               | “More Than Ever Before, Britain Needs British Columbia Lumber! Prevent Forest Fires” (Prince George Citizen; July 24, 1941) |
|           | Advertisements             | Advertisements or advertorials that use heat as a framing device                                                                                  | “Beat The Heat With Sunshine Krispy Crackers” (The Seattle Daily Times; July 13, 1941)                                      |

**Table S2.** A summary of newspaper publications used in this study.

| <b>Publication Title</b>     | <b>Publication City</b> | <b>Dates Used</b>  | <b>Publication Frequency</b> | <b>Source</b>                           | <b>Number of Issues</b> | <b>Number of Pages</b> |
|------------------------------|-------------------------|--------------------|------------------------------|-----------------------------------------|-------------------------|------------------------|
| Victoria Daily Times         | Victoria, Canada        | July 8 – 28, 1941  | Daily (except Sundays)       | BC Historical Newspapers                | 18                      | 343                    |
| Nanaimo Free Press           | Nanaimo, Canada         | July 8 – 28, 1941  | Daily (except Sundays)       | Newspapers.com                          | 18                      | 114                    |
| The Vancouver Daily Province | Vancouver, Canada       | July 8 – 28, 1941  | Daily (except Sundays)       | BC Historical Newspapers                | 18                      | 586                    |
| Vancouver Sun                | Vancouver, Canada       | July 8 – 28, 1941  | Daily (except Sundays)       | BC Historical Newspapers                | 18                      | 522                    |
| The Seattle Daily Times      | Seattle, USA            | July 8 – 28, 1941  | Daily                        | Seattle Daily Times Web Archives        | 21                      | 782                    |
| The Nome Nugget              | Nome, USA               | July 9 – 28, 1941  | Monday / Wednesday / Friday  | Library of Congress Chronicling America | 9                       | 36                     |
| The Daily Alaska Empire      | Juneau, USA             | July 8 – 28, 1941  | Daily (except Sundays)       | Library of Congress Chronicling America | 18                      | 142                    |
| The Bend Bulletin            | Bend, USA               | July 8 – 28, 1941  | Daily (except Sundays)       | Google Newspaper Archive                | 18                      | 148                    |
| The Interior News            | Smithers, Canada        | July 9 – 30, 1941  | Weekly (on Wednesdays)       | Newspapers.com                          | 4                       | 18                     |
| The Similkameen Star         | Princeton, Canada       | July 10 – 31, 1941 | Weekly (on Thursdays)        | BC Historical Newspapers                | 4                       | 18                     |
| The Daily News               | Prince Rupert, Canada   | July 8 – 28, 1941  | Daily (except Sundays)       | The Prince Rupert Newspaper Archive     | 18                      | 74                     |
| Kamloops Sentinel            | Kamloops, Canada        | July 10 – 31, 1941 | Weekly (on Thursdays)        | NewsHound (Thompson-Nicola Region)      | 4                       | 52                     |

|                             |                        |                       |                                         |                                           |    |     |
|-----------------------------|------------------------|-----------------------|-----------------------------------------|-------------------------------------------|----|-----|
| Prince George Citizen       | Prince George, Canada  | July 10 – 31, 1941    | Weekly (on Thursdays)                   | Prince George Newspapers                  | 4  | 32  |
| The Cariboo Observer        | Quesnel, Canada        | July 12 – Aug 2, 1941 | Weekly (on Saturdays)                   | Newspapers.com                            | 4  | 18  |
| The Whitehorse Star         | Whitehorse, Canada     | July 11 – Aug 1, 1941 | Weely (on Fridays)                      | Newspapers.com                            | 4  | 32  |
| The Herald-Tribune          | Grande Prairie, Canada | July 10 – 31, 1941    | Weekly (on Thursdays)                   | University of Calgary Digital Collections | 4  | 26  |
| Nelson Daily News           | Nelson, Canada         | July 8 – 28, 1941     | Daily (except Sundays; missing July 18) | BC Historical Newspapers                  | 17 | 180 |
| The Calgary Herald          | Calgary, Canada        | July 8 – 28, 1941     | Daily (except Sundays)                  | Proquest                                  | 18 | 375 |
| Edmonton Journal            | Edmonton, Canada       | July 8 – 28, 1941     | Daily (except Sundays)                  | Proquest                                  | 18 | 362 |
| Saskatoon Star-Phoenix      | Saskatoon, Canada      | July 8 – 28, 1941     | Daily (except Sundays)                  | Proquest                                  | 18 | 345 |
| The Leader-Post             | Regina, Canada         | July 8 – 28, 1941     | Daily (except Sundays)                  | Proquest                                  | 18 | 386 |
| The Winnipeg Tribune        | Winnipeg, Canada       | July 8 – 31, 1941     | Daily (except Sundays)                  | Newspapers.com                            | 21 | 501 |
| Minneapolis Morning Tribune | Minneapolis, USA       | July 8 – 31, 1941     | Daily (except Sundays)                  | Newspapers.com                            | 21 | 358 |
| The Windsor Daily Star      | Windsor, Canada        | July 8 – 31, 1941     | Daily (except Sundays)                  | Proquest                                  | 21 | 670 |
| The Globe and Mail          | Toronto, Canada        | July 8 – 31, 1941     | Daily (except Sundays)                  | Proquest                                  | 21 | 472 |

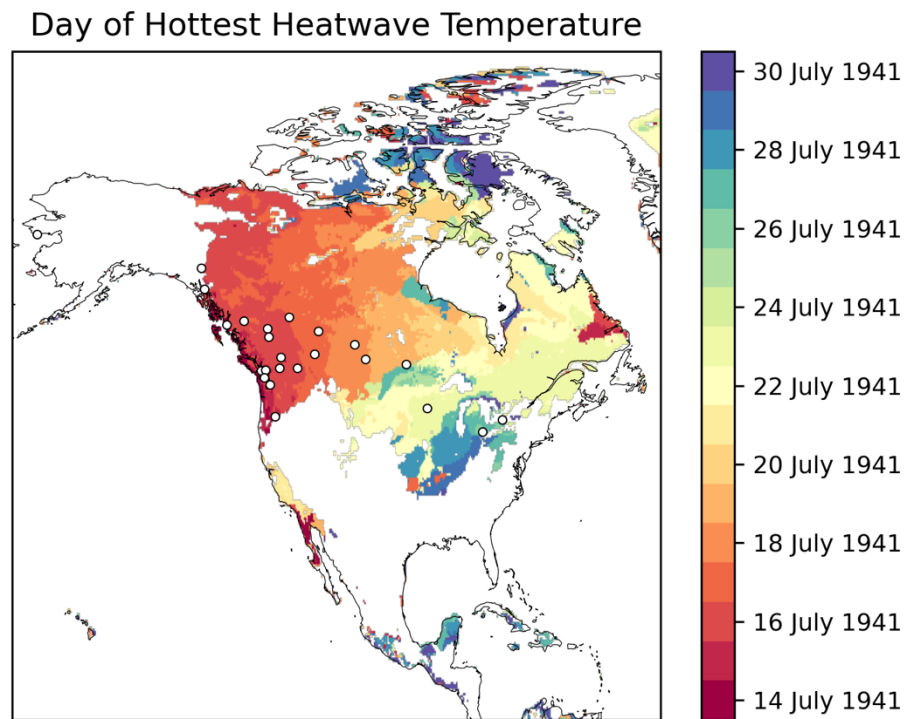

**Figure S1.** The day of hottest July temperature recorded after the onset of the heatwave, for grid cells that experienced hotter-than-normal temperatures after the onset of the heatwave (i.e. after July 13).



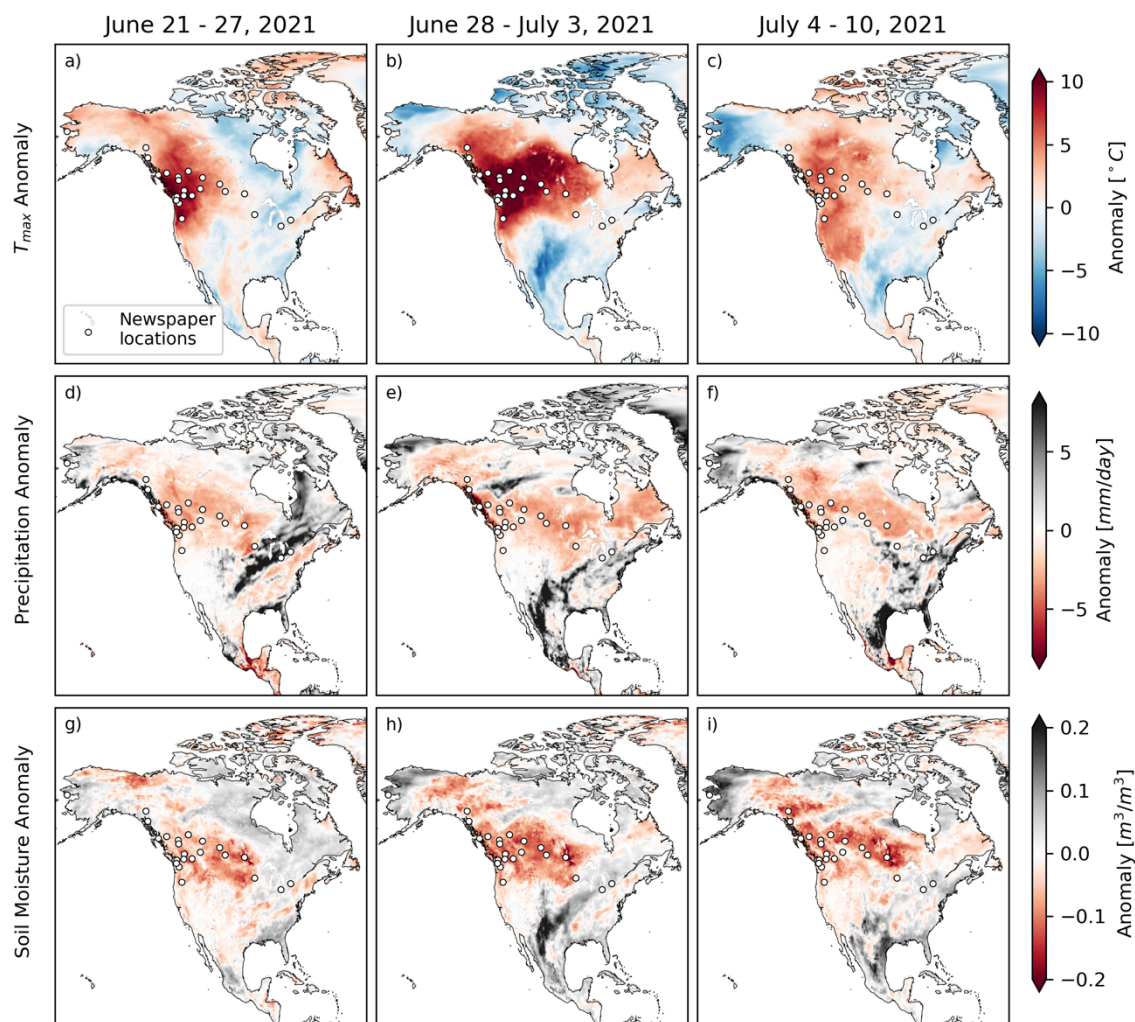

**Figure S2.** Weekly mean anomalies of a) – c) daily maximum temperature, d) – f) daily total precipitation, and g) – i) soil moisture in the top 7 cm of the soil column, from ERA5 reanalysis, for periods before, during, and after the 2021 heatwave. Anomalies are calculated relative to the 1990 – 2019 climatology.
